# Supplementary material
Source: PubMed Central journal article supplement (PMC4553949)

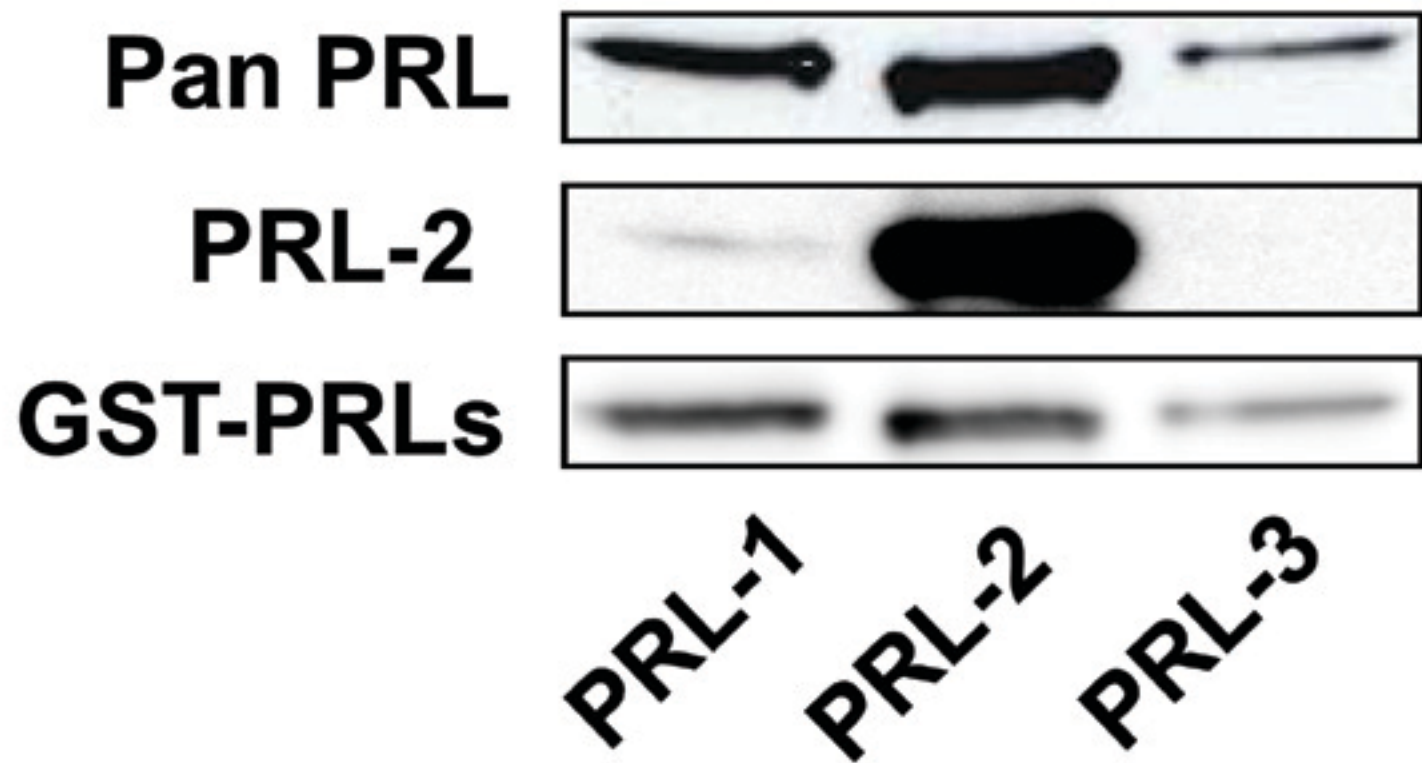

Supplement: NIHMS301583-supplement-2.pdf [file NIHMS301583-supplement-2.pdf]

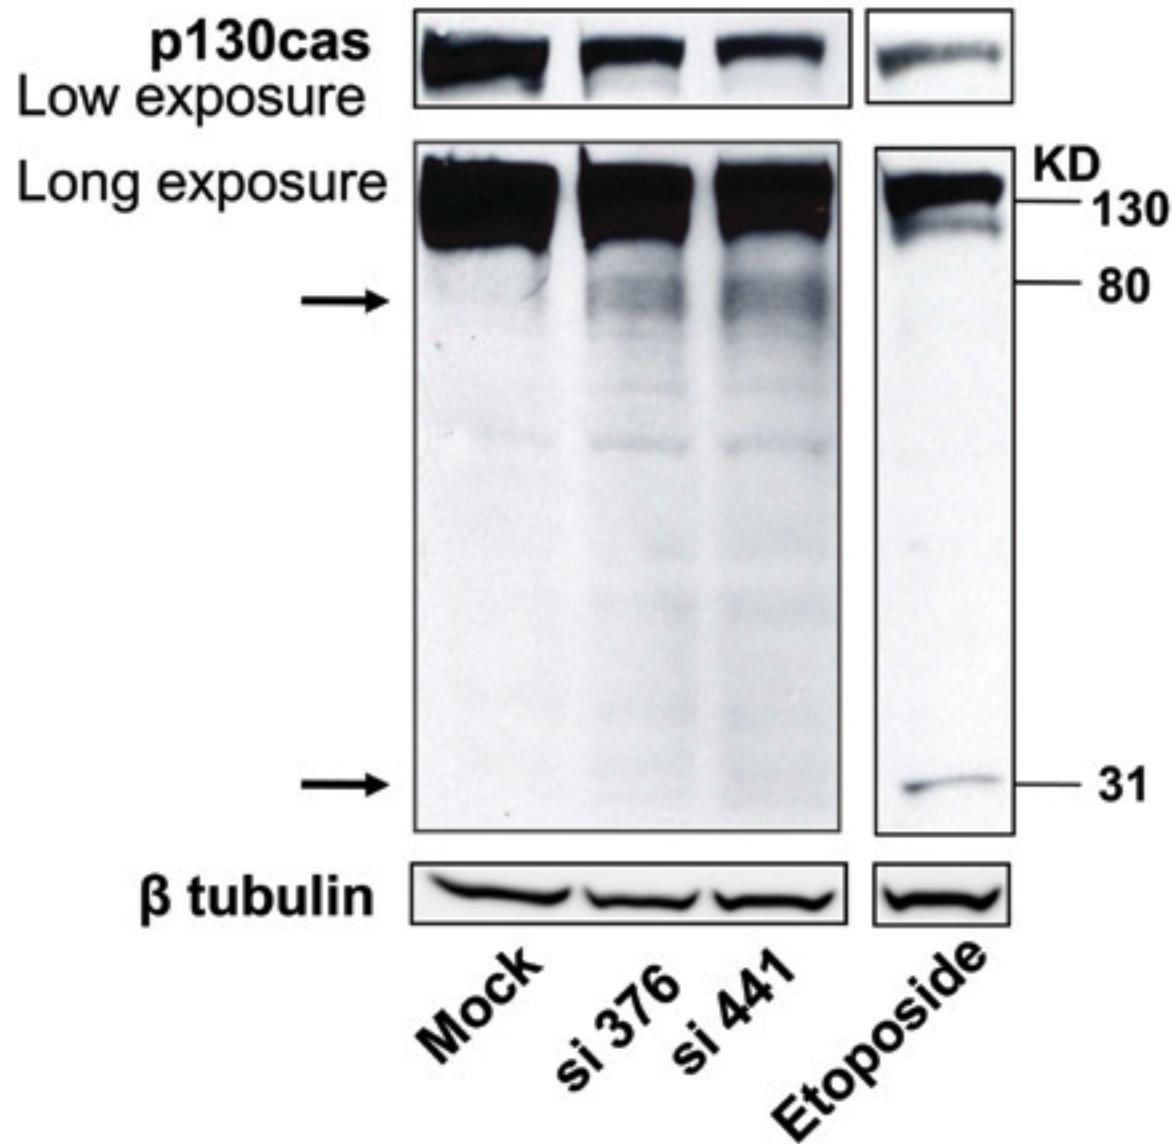

Supplement: NIHMS301583-supplement-5.pdf [file NIHMS301583-supplement-5.pdf]
